# Supplementary material
Source: PubMed Central journal article supplement (PMC8058634)
Supplement: NIHMS1686503-supplement-Supplemental_figures_tables.pdf [file NIHMS1686503-supplement-Supplemental_figures_tables.pdf]

## Supplementary Appendix

This appendix has been provided by the authors to give readers additional information about their work.

## **Supplementary Appendix**

### **Table of Contents**

|                                                                        |        |
|------------------------------------------------------------------------|--------|
| Key Patient Enrollment Criteria                                        | 2      |
| Lugano Classification for Efficacy Evaluation                          | 3      |
| Supplemental Figures (S1-S5)                                           | 6 – 11 |
| Table S1. DLBCL Subtype Patient Characteristics of 15 patients Treated | 12     |
| Table S2. Disposition of Patients on Study                             | 12     |
| Table S3. Serious Adverse Events of all 22 Patients                    | 13     |

## Key Patient Enrollment Criteria

### *Key Inclusion Criteria*

- B-cell NHL expressing CD20 by immunohistochemistry or flow cytometry, relapsed or refractory to at least 2 prior lines of therapy
- Eastern Cooperative Oncology Group (ECOG) score 0 – 2
- Disease that is measurable or assessable for response per Lugano Classification for lymphomas
- Hemoglobin  $\geq 9.5$  g/dL
- Absolute neutrophil count  $\geq 1.0 \times 10^9$ /mL
- Platelets  $\geq 50 \times 10^9$ /mL
- Serum creatinine  $\leq 1.5$  x upper limit of normal or calculated glomerular filtration rate  $> 40$  mL/min/1.73m<sup>2</sup>

### *Key Exclusion Criteria*

- Patients with active brain metastases
- Red blood cell transfusion dependence
- History of hemolytic anemia or Evans syndrome in the last 3 months
- Prior treatment with CD47 or signal regulatory protein alpha targeting agents
- Second malignancy, except indolent cancers not on active anti-cancer therapy
- Prior anti-cancer therapy within 2 weeks or at least 4 half-lives prior to dosing

## Lugano Classification for Efficacy Evaluation

| Response and Site                             | PET-CT–Based Response                                                                                                                                                                                                                                                                                                                                                                                                                                                                                                                              | CT-Based Response                                                                                                                                                                                                                                                                                                                 |
|-----------------------------------------------|----------------------------------------------------------------------------------------------------------------------------------------------------------------------------------------------------------------------------------------------------------------------------------------------------------------------------------------------------------------------------------------------------------------------------------------------------------------------------------------------------------------------------------------------------|-----------------------------------------------------------------------------------------------------------------------------------------------------------------------------------------------------------------------------------------------------------------------------------------------------------------------------------|
| Complete                                      | Complete metabolic response                                                                                                                                                                                                                                                                                                                                                                                                                                                                                                                        | Complete radiologic response (all of the following)                                                                                                                                                                                                                                                                               |
| Lymph nodes and extra lymphatic sites         | Score 1, 2, or 3 <sup>+</sup> with or without a residual mass on 5PS†<br>It is recognized that in Waldeyer's ring or extranodal sites with high physiologic uptake or with activation within spleen or marrow (e.g., with chemotherapy or myeloid colony-stimulating factors), uptake may be greater than normal mediastinum and/or liver. In this circumstance, complete metabolic response may be inferred if uptake at sites of initial involvement is no greater than surrounding normal tissue even if the tissue has high physiologic uptake | Target nodes/nodal masses must regress to < 1.5 cm in LDi<br>No extralymphatic sites of disease                                                                                                                                                                                                                                   |
| Nonmeasured lesion                            | Not applicable                                                                                                                                                                                                                                                                                                                                                                                                                                                                                                                                     | Absent                                                                                                                                                                                                                                                                                                                            |
| Organ enlargement                             | Not applicable                                                                                                                                                                                                                                                                                                                                                                                                                                                                                                                                     | Regress to normal                                                                                                                                                                                                                                                                                                                 |
| New lesions                                   | None                                                                                                                                                                                                                                                                                                                                                                                                                                                                                                                                               | None                                                                                                                                                                                                                                                                                                                              |
| Bone marrow                                   | No evidence of FDG-avid disease in marrow                                                                                                                                                                                                                                                                                                                                                                                                                                                                                                          | Normal by morphology; if indeterminate, IHC negative                                                                                                                                                                                                                                                                              |
| Partial                                       | Partial metabolic response                                                                                                                                                                                                                                                                                                                                                                                                                                                                                                                         | Partial remission (all of the following):                                                                                                                                                                                                                                                                                         |
| Partial                                       | Score 4 or 5† with reduced uptake compared with baseline and residual mass(es) of any size                                                                                                                                                                                                                                                                                                                                                                                                                                                         | > 50% decrease in SPD of up to 6 target measurable nodes and extranodal sites                                                                                                                                                                                                                                                     |
| Lymph nodes and extralymphatic sites          | At interim, these findings suggest responding disease<br>At end of treatment, these findings indicate residual disease                                                                                                                                                                                                                                                                                                                                                                                                                             | When a lesion is too small to measure on CT, assign 5 mm x 5 mm as the default value<br>When no longer visible, 0 x 0 mm<br>For a node > 5 mm x 5 mm, but smaller than normal, use actual measurement for calculation<br>Absent/normal, regressed, but no increase<br>Spleen must have regressed by > 50% in length beyond normal |
| Nonmeasured lesions                           | Not applicable                                                                                                                                                                                                                                                                                                                                                                                                                                                                                                                                     |                                                                                                                                                                                                                                                                                                                                   |
| Organ enlargement                             | Not applicable                                                                                                                                                                                                                                                                                                                                                                                                                                                                                                                                     |                                                                                                                                                                                                                                                                                                                                   |
| New lesions                                   | None                                                                                                                                                                                                                                                                                                                                                                                                                                                                                                                                               | None                                                                                                                                                                                                                                                                                                                              |
| Bone marrow                                   | Residual uptake higher than uptake in normal marrow but reduced compared with baseline (diffuse uptake compatible with reactive changes from chemotherapy allowed). If there are persistent focal changes in the marrow in the context of a nodal response, consideration should be given to further evaluation with MRI or biopsy or an interval scan                                                                                                                                                                                             | Not applicable                                                                                                                                                                                                                                                                                                                    |
| No response or stable disease                 | No metabolic response                                                                                                                                                                                                                                                                                                                                                                                                                                                                                                                              | Stable disease                                                                                                                                                                                                                                                                                                                    |
| Target nodes/nodal masses, extranodal lesions | Score 4 or 5 with no significant change in FDG uptake from baseline at interim or end of treatment                                                                                                                                                                                                                                                                                                                                                                                                                                                 | < 50% decrease from baseline in SPD of up to 6 dominant, measurable nodes and extranodal sites; no criteria for progressive disease are met                                                                                                                                                                                       |
| Nonmeasured lesions                           | Not applicable                                                                                                                                                                                                                                                                                                                                                                                                                                                                                                                                     | No increase consistent with progression                                                                                                                                                                                                                                                                                           |
| Organ enlargement                             | Not applicable                                                                                                                                                                                                                                                                                                                                                                                                                                                                                                                                     | No increase consistent with progression                                                                                                                                                                                                                                                                                           |
| New lesions                                   | None                                                                                                                                                                                                                                                                                                                                                                                                                                                                                                                                               | None                                                                                                                                                                                                                                                                                                                              |
| Bone marrow                                   | No change from baseline                                                                                                                                                                                                                                                                                                                                                                                                                                                                                                                            | Not applicable                                                                                                                                                                                                                                                                                                                    |

| Response and Site                    | PET-CT–Based Response                                                                                                                                                                              | CT-Based Response                                                                                                                                                                                                                                                                                                                                                                                                                                                                                                |
|--------------------------------------|----------------------------------------------------------------------------------------------------------------------------------------------------------------------------------------------------|------------------------------------------------------------------------------------------------------------------------------------------------------------------------------------------------------------------------------------------------------------------------------------------------------------------------------------------------------------------------------------------------------------------------------------------------------------------------------------------------------------------|
| Progressive disease                  | Progressive metabolic disease                                                                                                                                                                      | Progressive disease requires at least 1 of the following PPD progression:                                                                                                                                                                                                                                                                                                                                                                                                                                        |
| Individual target nodes/nodal masses | Score 4 or 5 with an increase in intensity of uptake from baseline and/or                                                                                                                          | An individual node/lesion must be abnormal with:                                                                                                                                                                                                                                                                                                                                                                                                                                                                 |
| Extranodal lesions                   | New FDG-avid foci consistent with lymphoma at interim or end-of-treatment assessment                                                                                                               | LDi > 1.5 cm and<br>Increase by > 50% from PPD nadir and An increase in LDi or SDi from nadir<br>0.5 cm for lesions < 2 cm<br>1.0 cm for lesions > 2 cm<br>In the setting of splenomegaly, the splenic length must increase by > 50% of the extent of its prior increase beyond baseline (e.g., a 15-cm spleen must increase to > 16 cm). If no prior splenomegaly, must increase by at least 2 cm from baseline<br>New or recurrent splenomegaly<br>New or clear progression of preexisting nonmeasured lesions |
| Nonmeasured lesions                  | None                                                                                                                                                                                               | Regrowth of previously resolved lesions                                                                                                                                                                                                                                                                                                                                                                                                                                                                          |
| New lesions                          | New FDG-avid foci consistent with lymphoma rather than another etiology (e.g., infection, inflammation). If uncertain regarding etiology of new lesions, biopsy or interval scan may be considered | A new node $\geq$ 1.5 cm in any axis<br>A new extranodal site $\geq$ 1.0 cm in any axis; if $\geq$ 1.0 cm in any axis, its presence must be unequivocal and must be attributable to lymphoma<br>Assessable disease of any size unequivocally attributable to lymphoma                                                                                                                                                                                                                                            |
| Bone marrow                          | New or recurrent FDG-avid foci                                                                                                                                                                     | New or recurrent involvement                                                                                                                                                                                                                                                                                                                                                                                                                                                                                     |

Abbreviations: 5PS = 5-point scale; CT = computed tomography; FDG = fluorodeoxyglucose; IHC = immunohistochemistry; LDi = longest transverse diameter of a lesion; MRI = magnetic resonance imaging; PET = positron emission tomography; PPD = cross product of the LDi and perpendicular diameter; SDi = shortest axis perpendicular to the LDi; SPD = sum of the product of the perpendicular diameters for multiple lesions.

Footnotes: \*A score of 3 in many patients indicates a good prognosis with standard treatment, especially if at the time of an interim scan. However, in trials involving PET where de-escalation is investigated, it may be preferable to consider a score of 3 as inadequate response (to avoid undertreatment).

Measured dominant lesions: Up to six of the largest dominant nodes, nodal masses, and extranodal lesions selected to be clearly measurable in two diameters. Nodes should preferably be from disparate regions of the body and should include, where applicable, mediastinal and retroperitoneal areas. Non-nodal lesions include those in solid organs (e.g., liver, spleen, kidneys, lungs), GI involvement, cutaneous lesions, or those noted on palpation.

Nonmeasured lesions: Any disease not selected as measured, dominant disease and truly assessable disease should be considered not measured. These sites include any nodes, nodal masses, and extranodal sites not selected as dominant or measurable or that do not meet the requirements for measurability but are still considered abnormal, as well as truly assessable disease, which is any site of suspected disease that would be difficult to follow quantitatively with measurement, including pleural effusions, ascites, bone lesions, leptomeningeal disease, abdominal masses, and other lesions that cannot be confirmed and followed by imaging.

In Waldeyer's ring or in extranodal sites (e.g., GI tract, liver, bone marrow), FDG uptake may be greater than in the mediastinum with complete metabolic response, but should be no higher than surrounding normal physiologic uptake (e.g., with marrow activation as a result of chemotherapy or myeloid growth factors).

†PET 5PS: 1, no uptake above background; 2, uptake  $\leq$  mediastinum; 3, uptake > mediastinum but  $\leq$  liver; 4, uptake moderately > liver; 5, uptake markedly higher than liver and/or new lesions; X, new areas

of uptake unlikely to be related to lymphoma. Source: Cheson BD, Fisher RI, Barrington SF, et al. Recommendations for initial evaluation, staging, and response assessment of Hodgkin and non-Hodgkin lymphoma: the Lugano Classification. J Clin Oncol. 2014;32(27):3059-3068 ([Cheson 2014](#)).

Reference:

Cheson BD, Fisher RI, Barrington SF, et al. Recommendations for initial evaluation, staging, and response assessment of Hodgkin and non-Hodgkin lymphoma: the Lugano classification. J Clin Oncol. 2014;32(27):3059-3068.

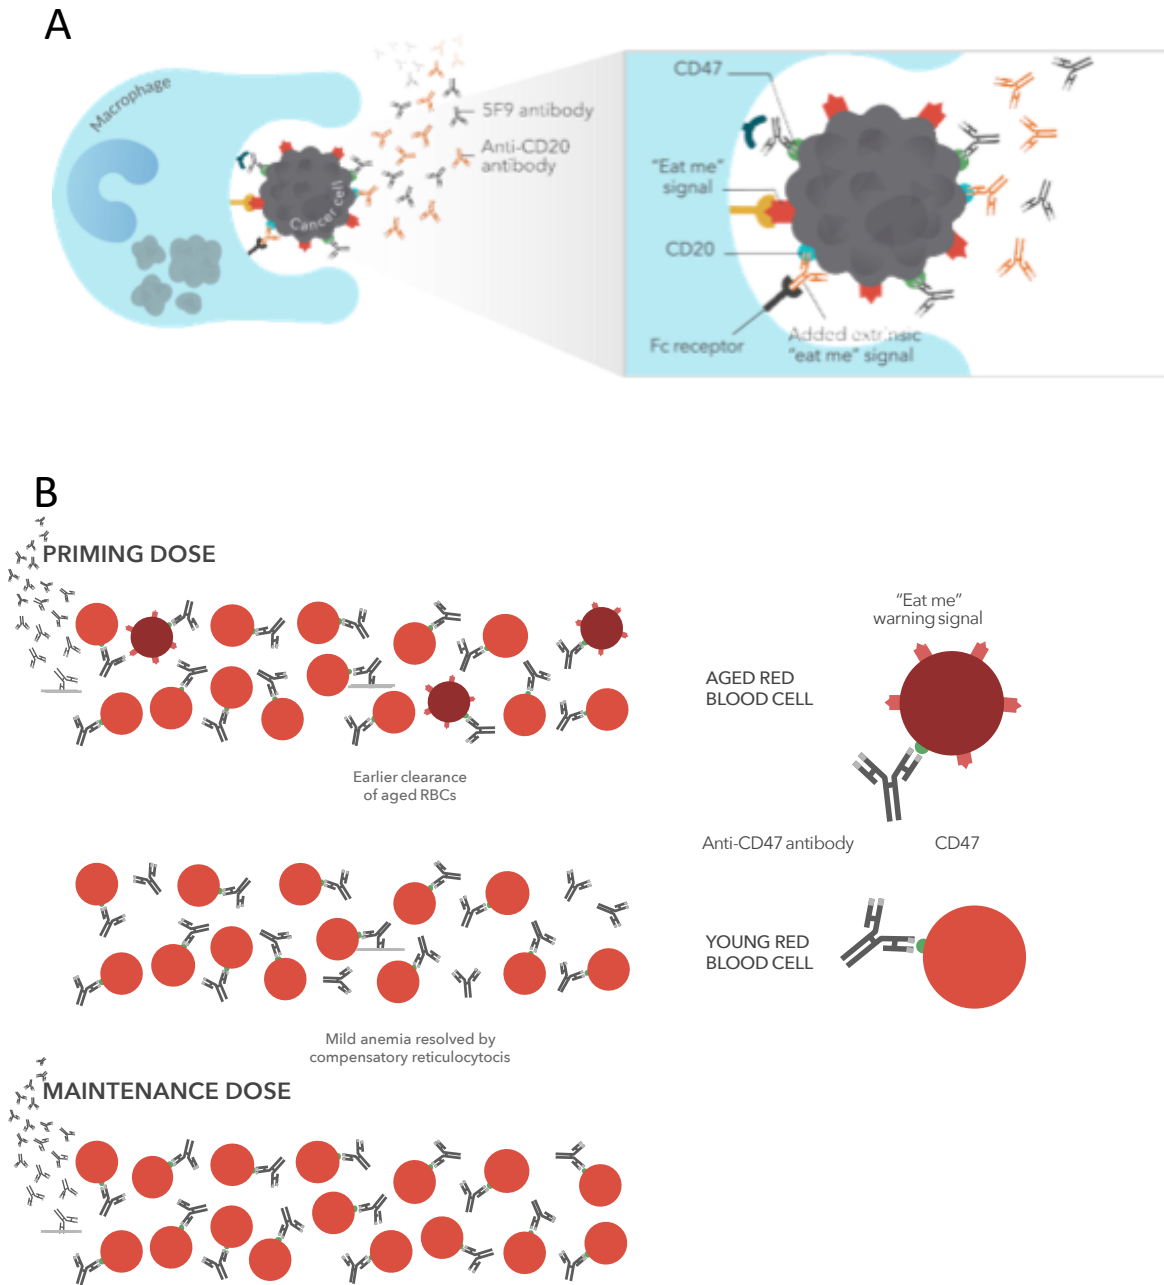

**Figure S1. Mechanism of Action for 5F9 + Rituximab Anti-Tumor Synergy and 5F9 Priming/Maintenance Dose Impact on Anemia**

A. Diagram showing mechanism of anti-tumor synergy combining 5F9 with rituximab. Synergy occurs through supply of an extrinsic "eat me" signal by rituximab through the Fc-Fc receptor interaction combined with blockade of the "do not eat me" CD47 signal by 5F9. B. Diagram showing the impact of a low priming dose of 5F9 eliminating only aged RBCs which express eat me signals whereas younger RBCs do not (top). The priming dose leads to a mild anemia resolved by a compensatory reticulocytosis as 5F9 shifts the pool of RBCs from old to young (middle). Higher maintenance doses can then be administered which leads to no further anemia (bottom).

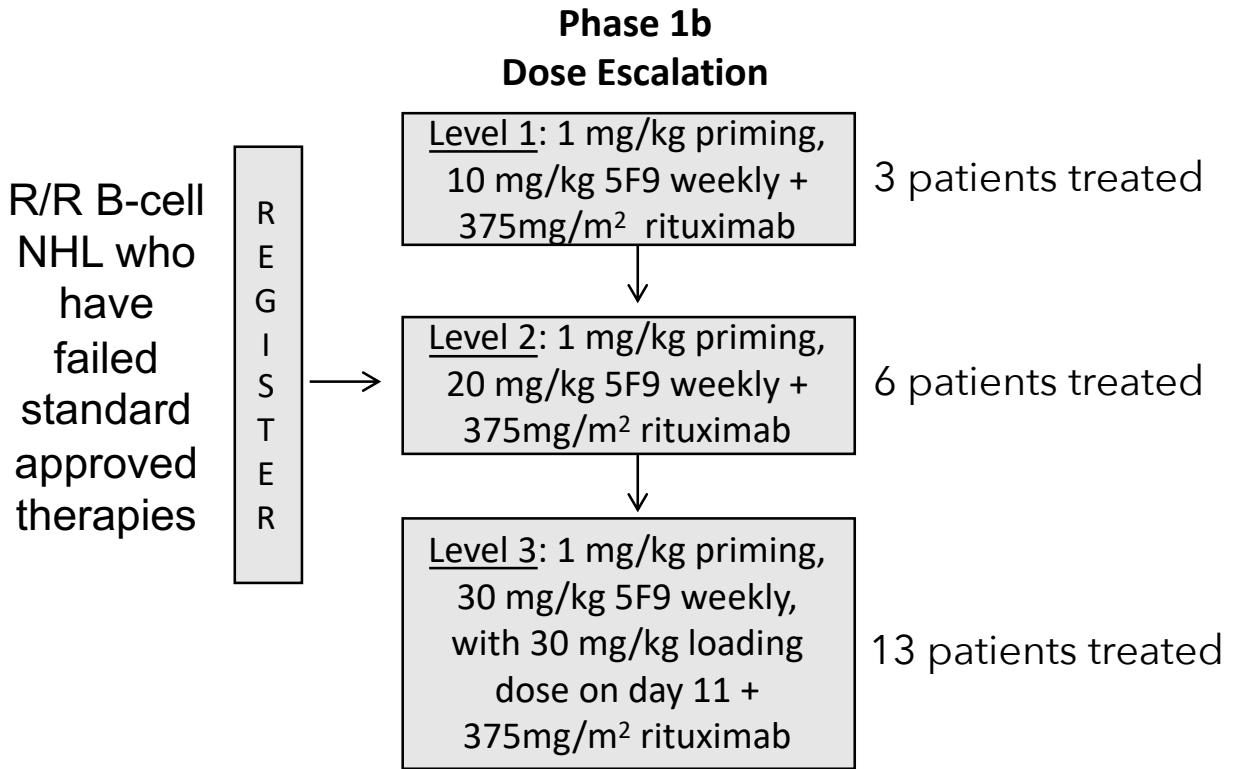

**Figure S2. Study Schema**

For all dose cohorts rituximab was administered at 375 mg/m<sup>2</sup> intravenously on days 8, 15 and 22 of cycle 1 and then day 1 in cycles 2-6.



### A Treatment-Related Adverse Events

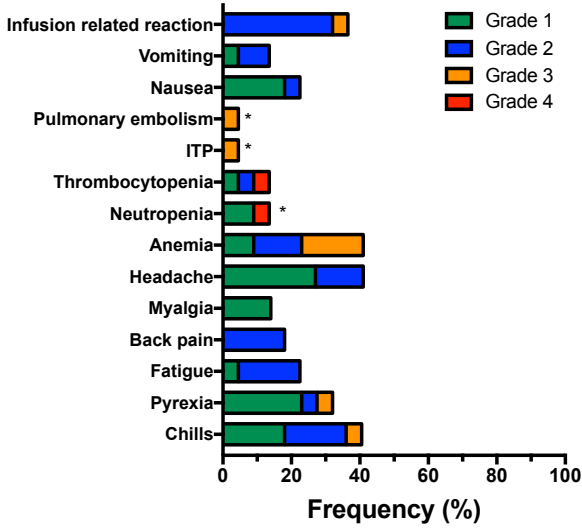

### B Average Number of Subjects with AE Related to 5F9 or Rituximab Study 5F9003 (NHL)

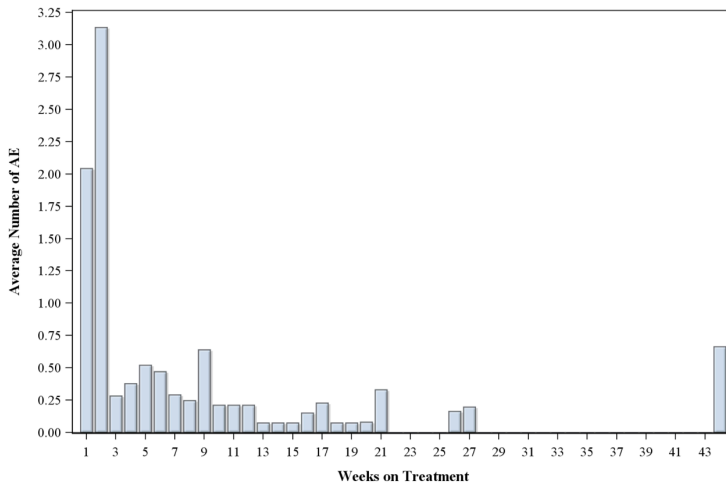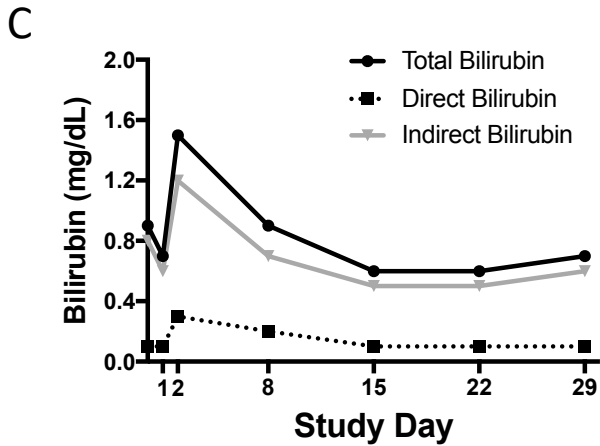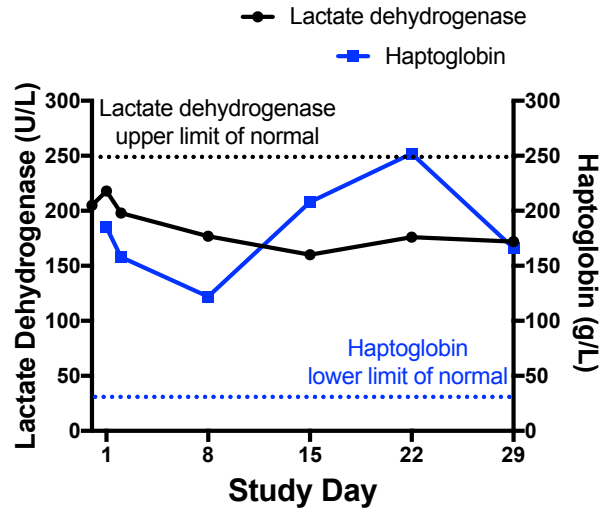

**Figure S3. Treatment-Related Adverse Events and Treatment-Related Adverse Events Over Time**

A. Treatment-related AEs observed in  $\geq 10\%$  of patients are shown as well as all dose limiting toxicities (\*) regardless of frequency. B. Average treatment-related AEs to 5F9 and/or rituximab per patient is shown across all patients over time. C. Labs evaluating hemolysis (bilirubin, lactate dehydrogenase and haptoglobin) are shown for a typical patient, treated at a 5F9 dose of 30 mg/kg weekly.

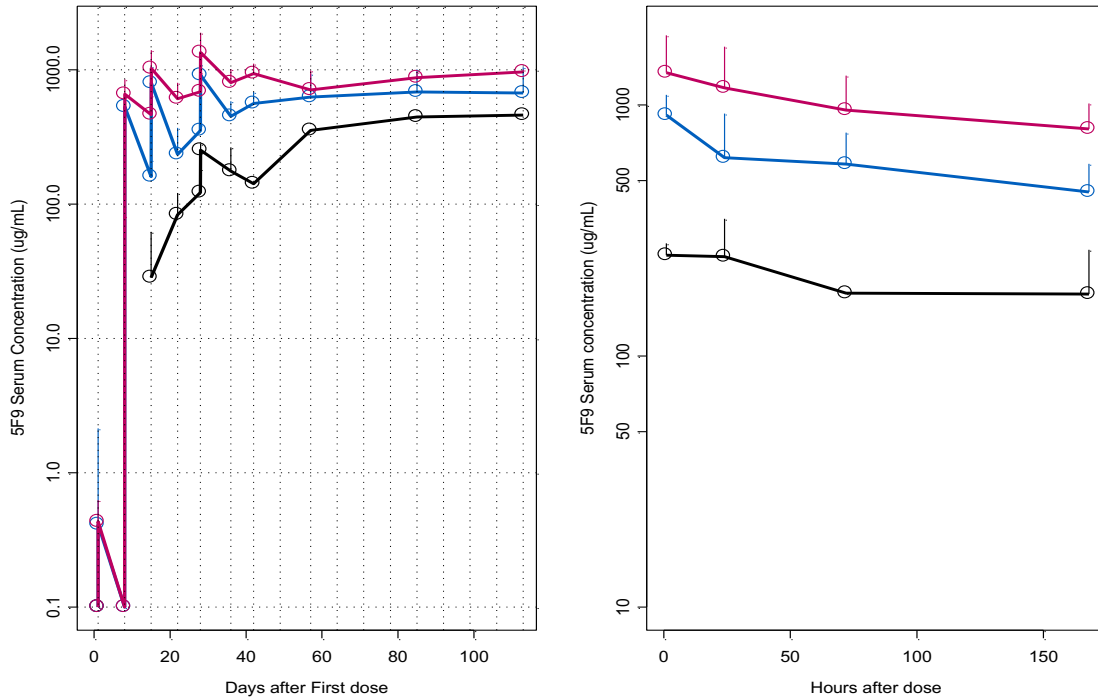

**Figure S4. Median (+SD) 5F9 Serum Concentration–Time Profile in NHL Patients Over the Dose Range 10-30 mg/kg Q Weekly**

Data represent serum 5F9 (median + standard deviation) for each of 10, 20, and 30 mg/kg treatment groups. Doses were given on Day 0 (priming dose of 1 mg/kg) and subsequently on Days 7-113 on a weekly basis. 5F9 concentrations in peak and trough serum samples over the duration of treatment are plotted on the left. The pharmacokinetic profile during week 5 (Days 28-36) vs time in hours is shown on the right.

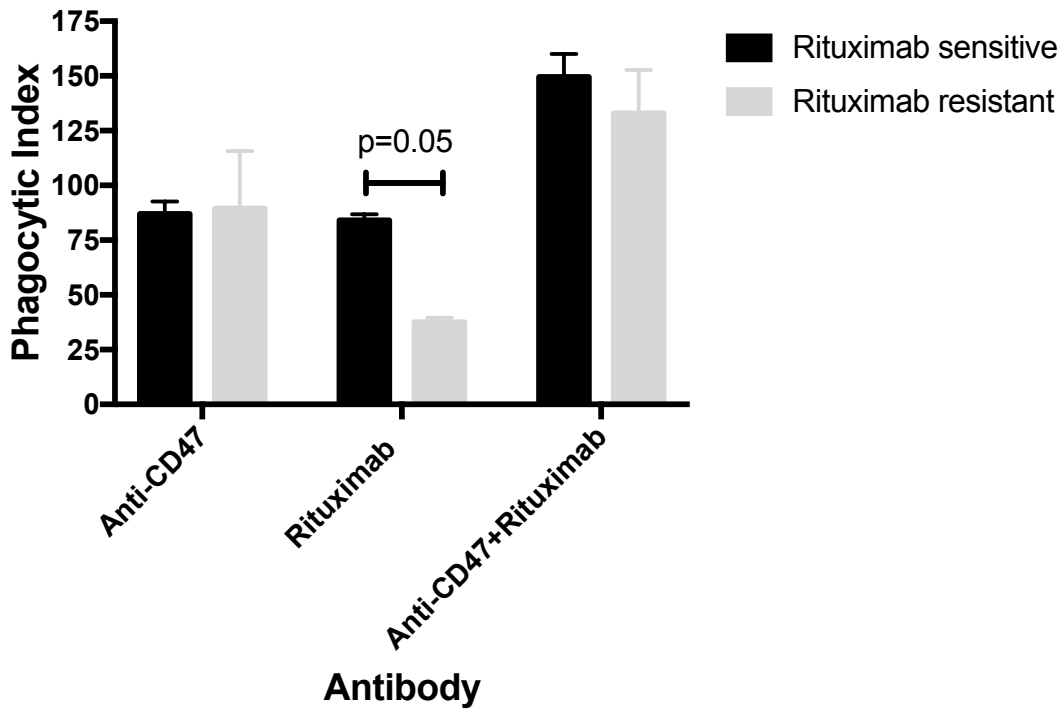

**Figure S5. Anti-CD47 Antibody Synergizes with Rituximab to Induce Phagocytosis of a Rituximab-Resistant Large Cell Lymphoma Cell Line**

Raji cells (a human aggressive large cell lymphoma cell line) were rendered rituximab resistant through serial passaging and exposure of rituximab to Raji cells in the presence of effector cells. Anti-CD47 antibody enabled phagocytosis in both rituximab sensitive and resistant Raji cells, whereby rituximab monotherapy was unable to induce phagocytosis of resistant cells. However, the combination of anti-CD47 antibody + rituximab enabled significantly increased phagocytosis compared to monotherapy alone, with no difference observed in the rituximab sensitive or resistant cell lines. P values are shown using a paired student's t-test.

## Supplemental Tables

**Table S1. DLBCL Subtype Patient Characteristics of 15 patients Treated**

| Characteristic                   | N (%)   | Objective Response (%) |
|----------------------------------|---------|------------------------|
| De novo DLBCL                    | 8 (53%) | 2/8 (25%)              |
| Transformed DLBCL                | 7 (47%) | 4/7 (57%)              |
| Cell of Origin                   |         |                        |
| Activated B-cell                 | 3 (20%) | 2/3 (67%)              |
| Germinal Center B-cell           | 6 (40%) | 1/6 (17%)              |
| Unknown                          | 6 (40%) | 3/6 (50%)              |
| Double hit lymphoma <sup>1</sup> | 3 (20%) | 1/3 (33%)              |

<sup>1</sup>Defined as high grade B-cell lymphomas with MYC and BCL2 and/or BCL6 rearrangement per WHO classification of lymphoid neoplasms<sup>26</sup>.

**Table S2. Disposition of Patients on Study**

| Characteristic                                   | Total (n=22)     | DLBCL (n=15)     | FL (n=7)         |
|--------------------------------------------------|------------------|------------------|------------------|
| Study discontinuation due to adverse event       | 1 (4.5%)         | 1 (6.7%)         | 0 (0%)           |
| Study discontinuation due to death               | 0 (0%)           | 0 (0%)           | 0 (0%)           |
| Study discontinuation due to disease progression | 9 (41%)          | 7 (47%)          | 2 (29%)          |
| Median treatment duration in weeks (range)       | 22 (1.7 – 70.7)  | 19 (1.7 – 59.3)  | 24 (5.1 – 70.7)  |
| Median number of Hu5F9-G4 infusions (range)      | 18.5 (3 – 67)    | 18 (3 – 50)      | 19 (3 – 67)      |
| Median number of Rituximab infusions (range)     | 7 (1 – 9)        | 7 (1 – 8)        | 8 (4 – 9)        |
| Duration of follow-up in months (range)          | 6.2 (1.9 – 16.4) | 6.2 (1.9 – 13.9) | 8.1 (1.9 – 16.4) |

**Table S3. Serious Adverse Events of all 22 Patients**

| <b>SAE (Any Grade)</b>    | <b>Frequency (%)</b> |
|---------------------------|----------------------|
| Infections                | 4 (18)               |
| Anemia                    | 1 (4.5)              |
| Dyspnea                   | 1 (4.5)              |
| Pyrexia                   | 1 (4.5)              |
| Lactic acidosis           | 1 (4.5)              |
| Retroperitoneal mass      | 1 (4.5)              |
| Pulmonary Embolism        | 1 (4.5)              |
| Infusion-related Reaction | 1 (4.5)              |

Notes: All SAEs are shown. MedDRA version 19.0
